# Supplementary material for: Reduced fatty acid uptake aggravates cardiac contractile dysfunction in streptozotocin-induced diabetic cardiomyopathy
Source: PubMed Central journal article supplement (PMC7705707; doi:10.1038/s41598-020-77895-1), 2020-11-30
Supplement: 41598_2020_77895_MOESM1_ESM.pdf [file 41598_2020_77895_MOESM1_ESM.pdf]

## Supplementary information file

Concerning the manuscript with the title  
**'Reduced fatty acid uptake aggravates cardiac contractile dysfunction in streptozotocin-induced diabetic cardiomyopathy'**

### **Authors**

Yogi Umbarawan, Ryo Kawakami,  
Mas Rizky A.A Syamsunarno, Norimichi Koitabashi, Hideru Obinata, Aiko  
Yamaguchi, Hirofumi Hanaoka, Takako Hishiki, Noriyo Hayakawa, Hiroaki Sunaga,  
Hiroki Matsui, Masahiko Kurabayashi, Tatsuya Iso

## **Supplemental Methods**

### **Cross sectional area**

Hearts were fixed with 10% formalin, embedded in paraffin and sectioned into 8  $\mu\text{m}$  slices. To assess cardiomyocyte cross-sectional area, tissue was stained with wheat germ agglutinin (WGA; plasma membrane staining, Alexa Fluor 488 conjugated).

### **RNA isolation and real time PCR**

Total RNA was isolated from hearts using the TRIzol Reagent (Invitrogen). Quantitative real-time PCR was performed with SYBR Green PCR Master Mix (Applied Biosystems), according to the manufacturer's instructions. The expression level of the target gene was normalized to the GAPDH (glyceraldehyde-3-phosphate dehydrogenase) mRNA level. The ready-to-use gene-specific primers for cDNA (Perfect Real Time Primer) were purchased from Takara Bio Inc. (Shiga, Japan).

## Supplementary figure 1

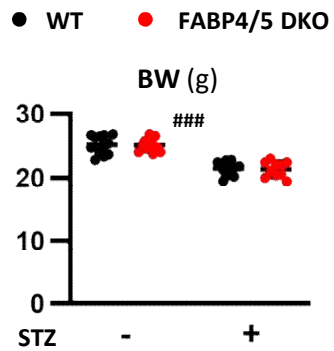

**Figure S1.** Body weight (BW) was significantly reduced by STZ treatment (n=10-12). STZ ###p<0.001.

## Supplementary figure 2

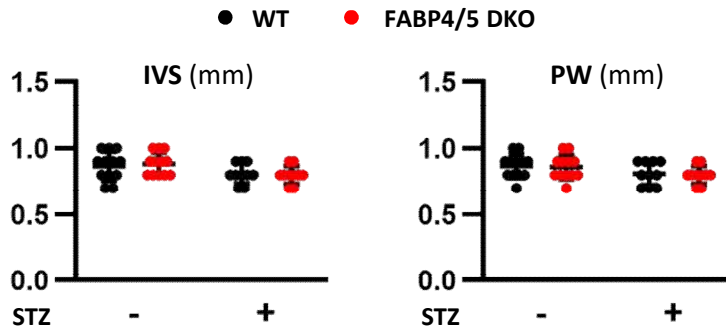

**Figure S2.** Wall thickness of left ventricles estimated by echocardiography (n=10-12). IVS; interventricular septum, PW; posterior wall.

## Supplementary figure 3

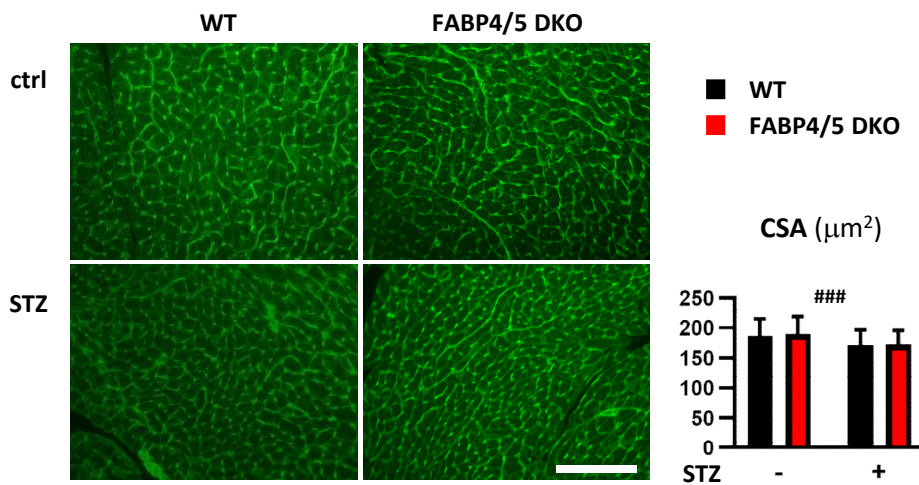

**Figure S3.** Cross sectional area (CSA) was reduced by STZ treatment in both mice (n=6). Scale bar = 100  $\mu\text{m}$ . STZ ###p<0.001.

## Supplementary figure 4

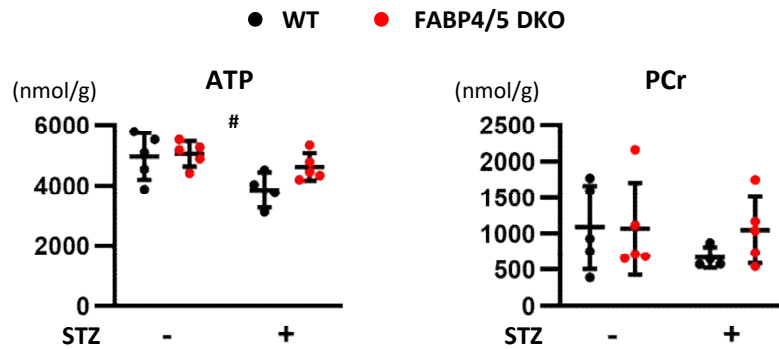

**Figure S4.** ATP and PCr levels measured by metabolome analysis (n=4-5). ATP; adenosine triphosphate, PCr; creatinine phosphate. STZ #p<0.05.

## Supplementary figure 5

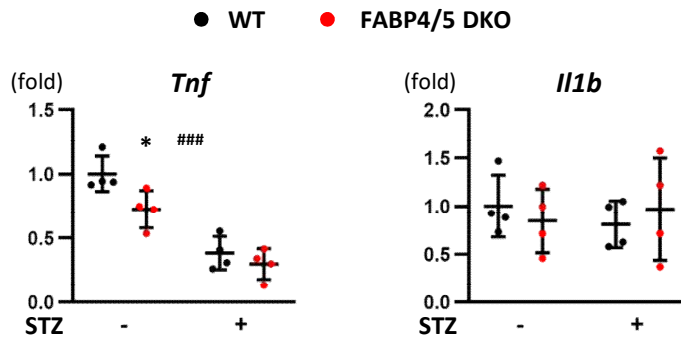

**Figure S5.** Expression levels of mRNA for *Tnf* and *Il1b* (n=4). *Tnf*: tumor necrosis factor  $\alpha$ , *Il1b*; interleukin-1 $\beta$ . DKO \*p<0.05, STZ ###p<0.001.

## Supplementary figure 6

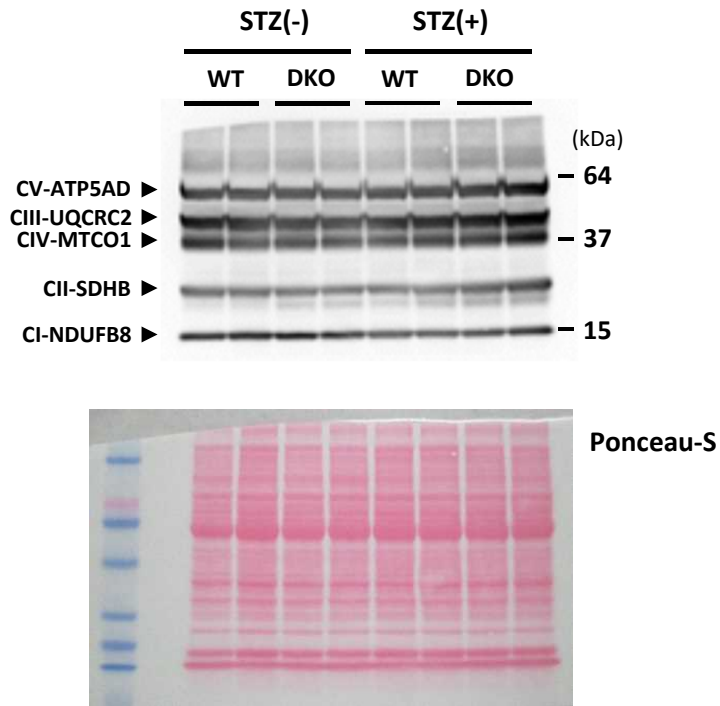

**Figure S6.** Full length western blots of representative proteins in mitochondrial electron transport chain complex. Equal amount of loaded protein was confirmed by ponceau-S staining. The 1<sup>st</sup> antibody used was total OXPHOS rodent western blot antibody cocktail (Abcam110413, MA). CV-ATP5A; complex V-ATP synthase subunit alpha, CIII-UQCRC2; complex III-cytochrome b-c1 complex subunit 2, CIV-MTCO1; complex IV-cytochrome c oxidase subunit 1, CII-SDHB; complex II-succinate dehydrogenase subunit B, CI-NDUFB8; complex I- NADH dehydrogenase (ubiquinone) 1 beta subunit 8.



## Supplementary figure 7

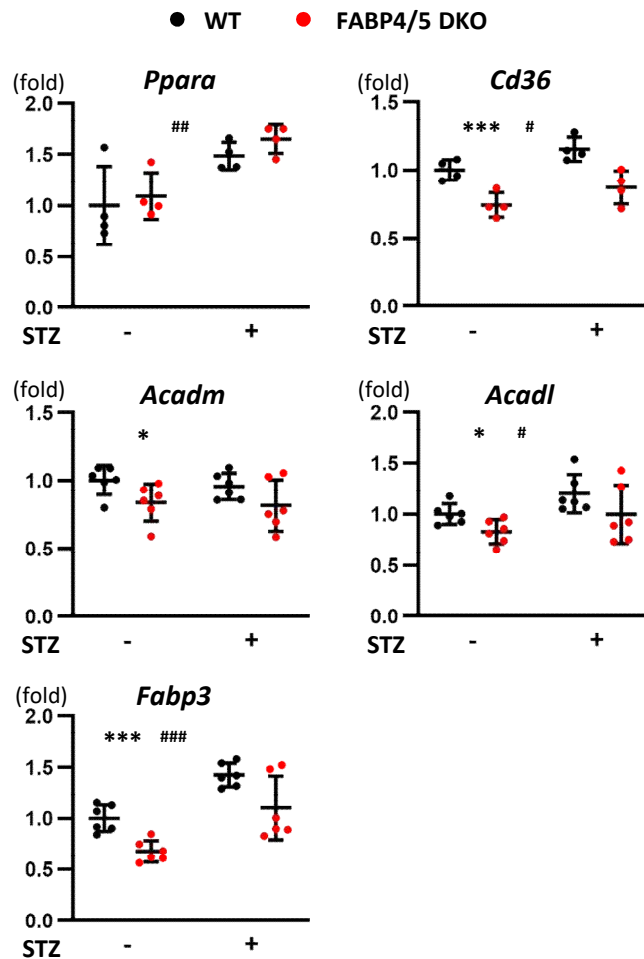

**Figure S7.** Expression levels of mRNA for *Ppara*, *Cd36*, *Acadm*, *Acadl* and *Fabp3* (n=6). *Ppara*: peroxisome proliferator activated receptor  $\alpha$ , *Acadm*; acyl-CoA dehydrogenase medium chain, *Acadl*; acyl-CoA dehydrogenase long chain, *Fabp3*; fatty acid binding protein 3. DKO \* $p < 0.05$ , \*\*\*  $p < 0.001$ , STZ # $p < 0.05$ , ## $p < 0.01$ , ### $p < 0.001$ .

## Supplementary figure 8

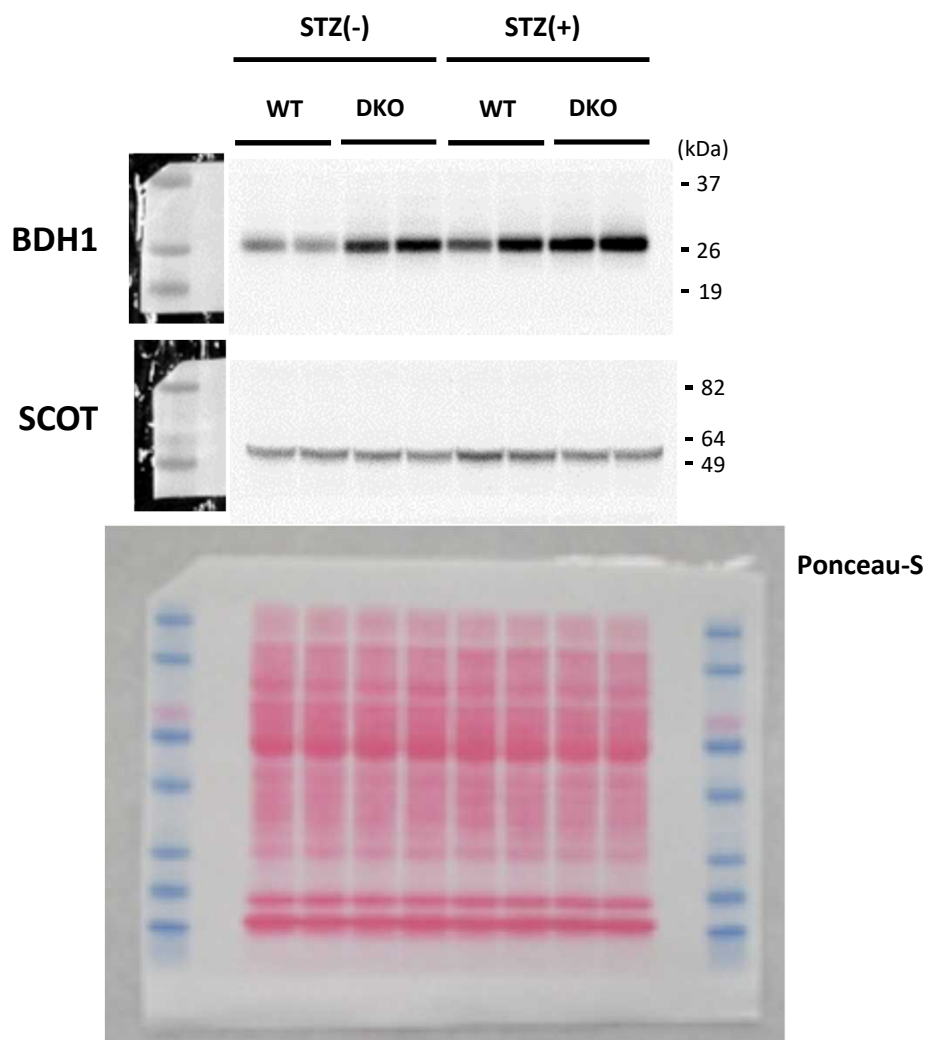

**Figure S8.** Full length western blots of figure 3B. Membranes were cut after ponceau-S staining to save 1<sup>st</sup> antibodies.

## Supplementary figure 9

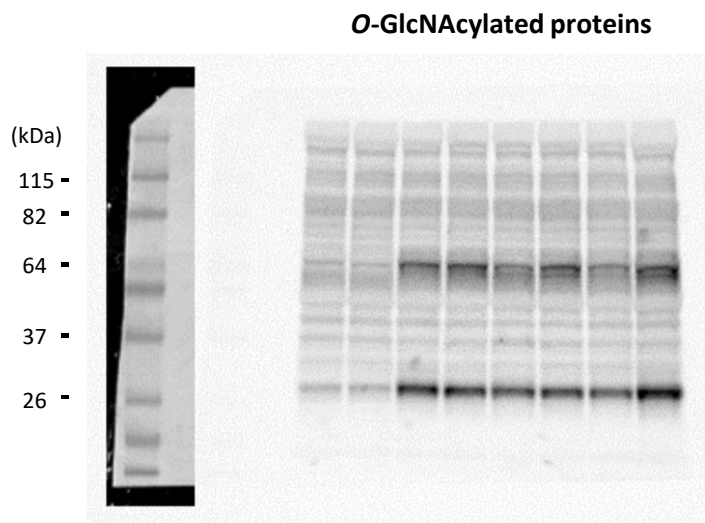

**Figure S9.** Full length western blot of figure 5B.
